# Supplementary material for: Accurate Binding Free Energy Method from End-State MD Simulations
Source: PubMed Central journal article supplement (PMC9472276; doi:10.1021/acs.jcim.2c00601), 2022-08-16
Supplement: ci2c00601_si_001.pdf [file ci2c00601_si_001.pdf]

Supporting Information

# An accurate binding free energy method from end-state MD simulations

*Ebru Akkus, Omer Tayfuroglu, Muslum Yildiz, and Abdulkadir Kocak<sup>1</sup>*

Department of Chemistry, Gebze Technical University, 41400, Kocaeli/Turkey

---

<sup>1</sup> Corresponding to: Abdulkadir Kocak, Email: kocak@gtu.edu.tr, Phone:

+902626053083

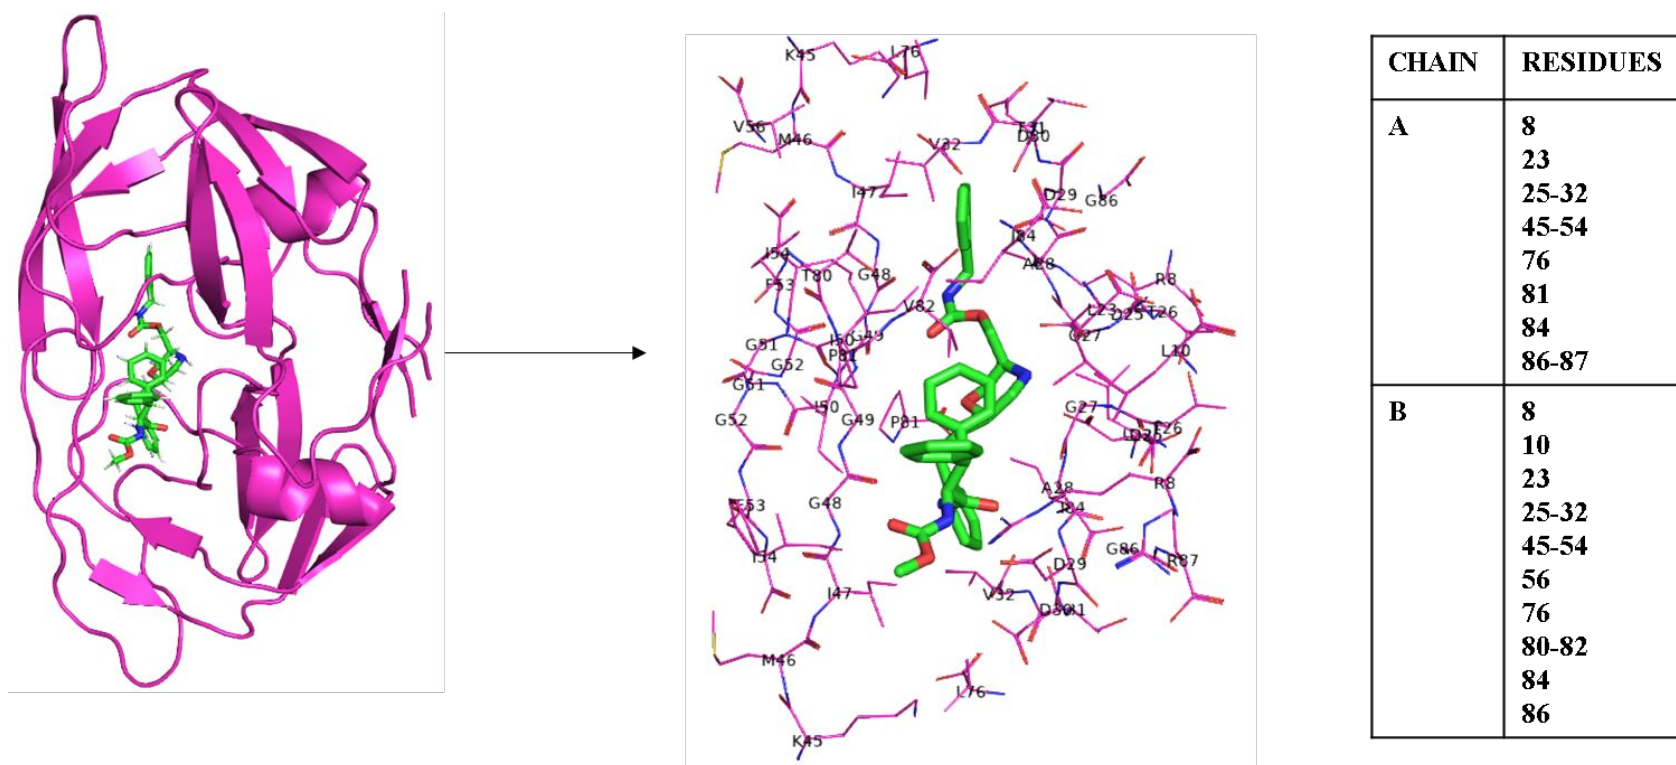

**Figure S1:** Truncated protein-ligand system (HIV protease, PDB id=5IVS) in the DFT calculation as a comparison to ANI, in which all the P-L system can also be calculated. All the residues were saturated with H atoms to make the structure neutral. All H atoms were omitted from structures for better view. The table shows which residues included in the truncated protein.

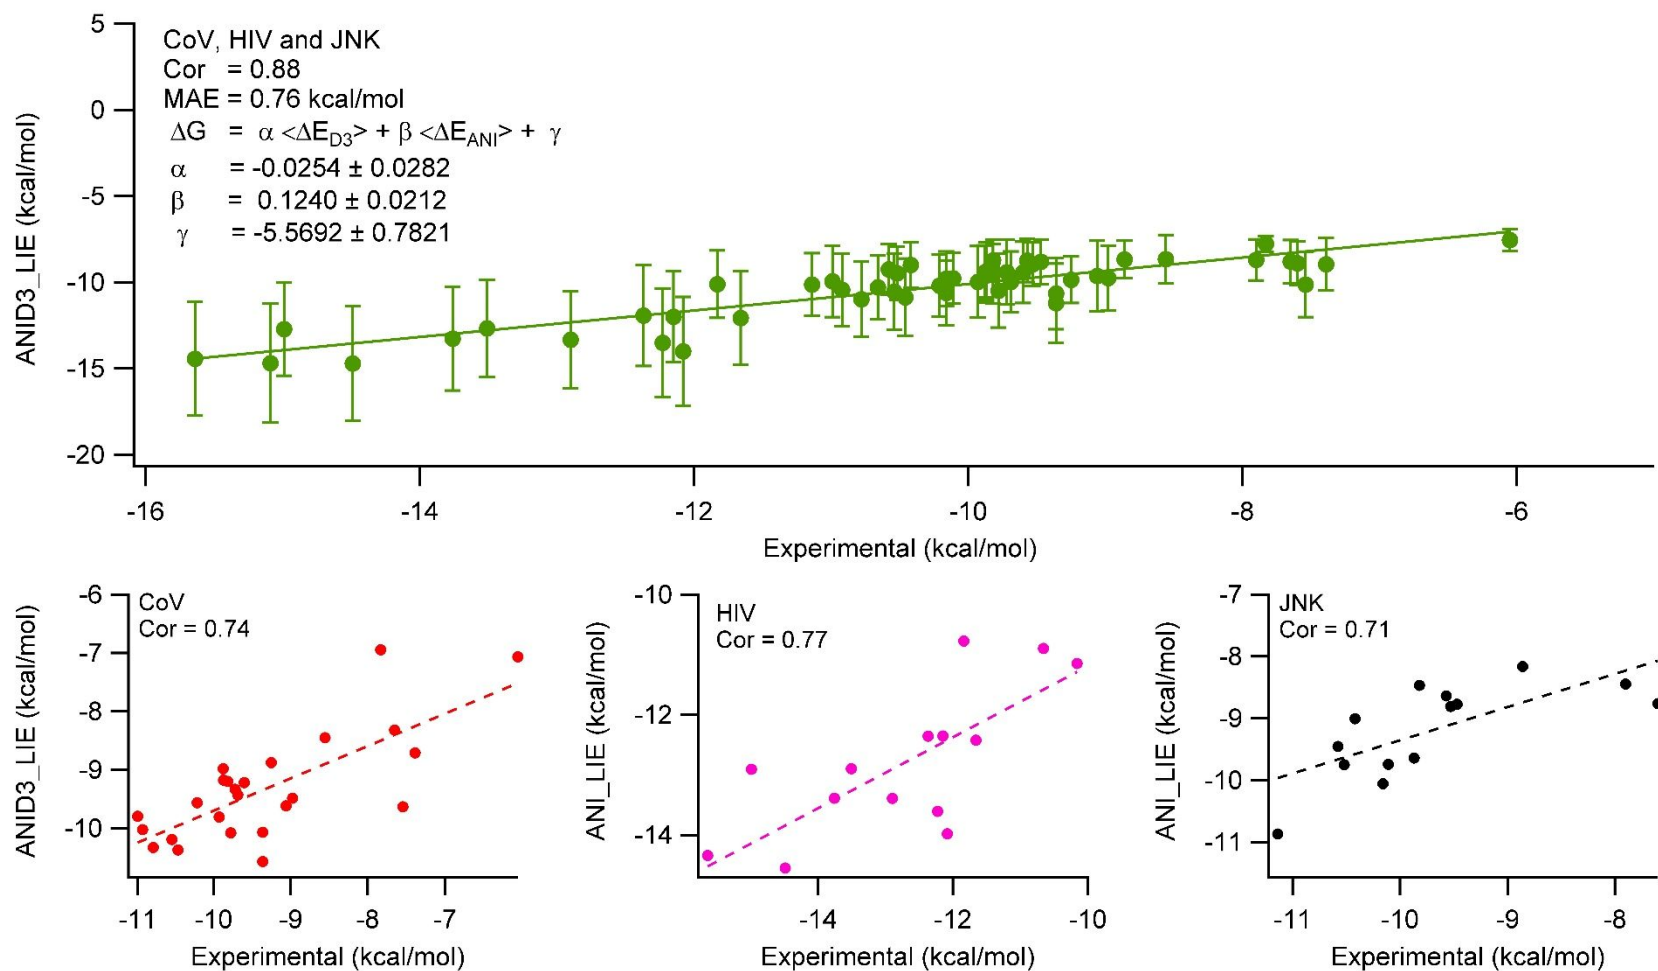

**Figure S2:** ANID3 interaction energies calculated from the equation (5) with  $\alpha=-0.0254\pm0.0282$ ,  $\beta=0.1240 \pm 0.0212$  and  $\gamma=-5.5692 \pm 0.7821$  using average of 1000 snapshots of 10 ns MD simulation for 54 protein ligand complexes, showing 0.88 correlation to the experimental values. The bar lines show the mean absolute error. The bottom plots show the fits of individual protein families as CoV, HIV-1 and JNK-1.

Table S1: MM energy terms and LIE for complete vs reduced water, showing reducing system hardly affects

the results.

| PDB ID | Complete water         |                      | $\alpha=0.181$ ;<br>$\beta=0.5$ | Reduced water          |                      | $\alpha=0.181$ ;<br>$\beta=0.5$            | Diff_coul | Diff_lj | Diff_LIE |
|--------|------------------------|----------------------|---------------------------------|------------------------|----------------------|--------------------------------------------|-----------|---------|----------|
|        | L-rest_coul (kcal/mol) | L-rest_LJ (kcal/mol) | LIE_whole systemt (kcal/mol)    | L-rest_coul (kcal/mol) | L-rest_LJ (kcal/mol) | LIE reduced water only 4Awaters (kcal/mol) |           |         |          |
| 2GZ7   | -10.76                 | -11.29               | -3.23                           | -9.92                  | -9.94                | -2.57                                      | -0.84     | -1.35   | -0.67    |
| 2GZ8   | -18.02                 | -17.36               | -2.09                           | -18.21                 | -14.33               | -1.63                                      | 0.19      | -3.03   | -0.45    |
| 3V3M   | -13.71                 | -11.04               | -3.07                           | -10.51                 | -10.38               | -1.35                                      | -3.20     | -0.67   | -1.72    |
| 4MDS   | -24.22                 | -17.62               | 0.54                            | -24.48                 | -15.78               | 0.75                                       | 0.26      | -1.85   | -0.20    |
| 4YOJ   | -19.46                 | -10.19               | -3.18                           | -19.61                 | -8.74                | -2.99                                      | 0.15      | -1.46   | -0.19    |
| 7L10   | -7.89                  | -13.27               | -1.12                           | -8.59                  | -11.95               | -1.23                                      | 0.69      | -1.31   | 0.11     |
| 7L11   | -4.85                  | -12.07               | -2.11                           | -5.40                  | -11.01               | -2.19                                      | 0.55      | -1.06   | 0.08     |
| 7L12   | -20.46                 | -12.98               | 1.01                            | -20.92                 | -11.38               | 1.07                                       | 0.46      | -1.60   | -0.06    |
| 7L13   | -24.10                 | -13.36               | -1.51                           | -24.65                 | -11.87               | -1.51                                      | 0.55      | -1.50   | 0.01     |
| 7L14   | -4.96                  | -13.68               | -2.45                           | -5.49                  | -12.44               | -2.49                                      | 0.52      | -1.23   | 0.04     |
| 7LMF   | -12.31                 | -11.89               | -3.15                           | -12.69                 | -10.76               | -3.13                                      | 0.38      | -1.13   | -0.02    |
| 7LMG   | -14.46                 | -11.42               | -2.65                           | -14.69                 | -10.38               | -2.57                                      | 0.23      | -1.04   | -0.07    |
| 7LMH   | -15.27                 | -13.71               | -1.78                           | -15.72                 | -12.38               | -1.77                                      | 0.45      | -1.34   | -0.01    |
| 7LMI   | -14.99                 | -11.89               | -1.12                           | -15.26                 | -10.82               | -1.06                                      | 0.28      | -1.08   | -0.06    |
| 7M8M   | -25.97                 | -11.67               | -2.64                           | -26.39                 | -10.35               | -2.61                                      | 0.42      | -1.33   | -0.03    |
| 7M8N   | -27.85                 | -13.39               | -3.78                           | -28.22                 | -11.67               | -3.65                                      | 0.36      | -1.72   | -0.13    |
| 7M8O   | -19.07                 | -13.19               | -0.79                           | -19.16                 | -11.69               | -0.56                                      | 0.09      | -1.50   | -0.23    |
| 7M8P   | -23.13                 | -14.29               | -1.10                           | -23.96                 | -12.59               | -1.20                                      | 0.82      | -1.70   | 0.10     |
| 7M8X   | -10.86                 | -13.16               | -2.46                           | -11.54                 | -11.86               | -2.56                                      | 0.68      | -1.30   | 0.11     |
| 7M8Y   | -25.35                 | -16.43               | 0.47                            | -25.82                 | -14.49               | 0.58                                       | 0.48      | -1.95   | -0.11    |
| 7M8Z   | -28.66                 | -12.70               | 0.32                            | -28.94                 | -10.92               | 0.50                                       | 0.28      | -1.78   | -0.18    |
| 7M90   | -33.05                 | -14.38               | -1.91                           | -33.09                 | -12.64               | -1.61                                      | 0.04      | -1.73   | -0.29    |
| 7M91   | -18.63                 | -10.96               | 0.34                            | -18.98                 | -9.99                | 0.34                                       | 0.35      | -0.97   | 0.00     |
| 7N44   | -22.70                 | -12.97               | 0.20                            | -23.08                 | -11.48               | 0.28                                       | 0.38      | -1.50   | -0.08    |
| 7P51   | -14.64                 | -9.94                | -0.38                           | -14.95                 | -9.07                | -0.38                                      | 0.31      | -0.86   | 0.00     |
| 2A4F   | -23.79                 | -9.82                | 0.20                            | -23.82                 | -9.01                | 0.33                                       | 0.02      | -0.81   | -0.13    |
| 3R0W   | -55.87                 | -15.94               | 1.13                            | -55.73                 | -15.06               | 1.35                                       | -0.13     | -0.88   | -0.22    |
| 3R0Y   | -38.54                 | -16.56               | -0.95                           | -38.43                 | -15.59               | -0.72                                      | -0.12     | -0.98   | -0.23    |
| 3SPK   | -8.94                  | -8.21                | -0.63                           | -8.83                  | -7.77                | -0.49                                      | -0.11     | -0.44   | -0.14    |
| 4KB9   | -19.53                 | -6.86                | -2.31                           | -19.52                 | -6.38                | -2.22                                      | -0.01     | -0.49   | -0.09    |
| 5DGW   | -16.30                 | -10.96               | 0.39                            | -16.40                 | -10.19               | 0.48                                       | 0.10      | -0.76   | -0.09    |
| 5IVS   | -31.12                 | -15.71               | -9.37                           | -31.25                 | -14.20               | -9.16                                      | 0.13      | -1.51   | -0.21    |
| 5IVT   | -26.26                 | -10.23               | -4.20                           | -26.14                 | -8.98                | -3.91                                      | -0.12     | -1.25   | -0.29    |
| 5TYS   | -31.76                 | -11.71               | -3.09                           | -31.50                 | -10.64               | -2.76                                      | -0.26     | -1.07   | -0.33    |
| 5ULT   | -18.51                 | -9.58                | -1.06                           | -18.77                 | -9.03                | -1.10                                      | 0.26      | -0.55   | 0.03     |
| 5UOV   | -36.78                 | -25.32               | -0.16                           | -37.10                 | -22.58               | 0.17                                       | 0.32      | -2.73   | -0.33    |
| 6CDJ   | -32.87                 | -17.31               | -6.78                           | -33.08                 | -15.98               | -6.64                                      | 0.20      | -1.33   | -0.14    |
| 6CDL   | -11.60                 | -13.63               | -0.90                           | -11.72                 | -12.82               | -0.82                                      | 0.12      | -0.80   | -0.09    |
| 6VOE   | -31.69                 | -13.75               | -7.78                           | -21.30                 | -13.81               | -2.60                                      | -10.38    | 0.06    | -5.18    |
| 7MYP   | -17.19                 | -9.22                | -4.31                           | -17.19                 | -8.82                | -4.24                                      | 0.00      | -0.41   | -0.07    |
| 18624  | -6.77                  | -8.06                | 4.23                            | -6.96                  | -7.39                | 4.25                                       | 0.19      | -0.67   | -0.03    |
| 18629  | -9.01                  | -8.22                | 3.77                            | -9.16                  | -7.50                | 3.83                                       | 0.15      | -0.72   | -0.05    |
| 18630  | -6.19                  | -8.41                | 3.49                            | -6.49                  | -7.62                | 3.48                                       | 0.30      | -0.79   | 0.01     |
| 18631  | -4.78                  | -8.01                | 3.61                            | -5.02                  | -7.27                | 3.63                                       | 0.24      | -0.74   | -0.01    |

|       |        |        |      |        |       |      |       |       |       |
|-------|--------|--------|------|--------|-------|------|-------|-------|-------|
| 18632 | -10.81 | -8.45  | 3.13 | -10.98 | -7.68 | 3.18 | 0.17  | -0.76 | -0.06 |
| 18633 | -6.03  | -9.12  | 3.86 | -6.16  | -8.26 | 3.95 | 0.13  | -0.86 | -0.09 |
| 18634 | -9.23  | -9.02  | 2.98 | -9.39  | -8.17 | 3.05 | 0.16  | -0.84 | -0.07 |
| 18635 | -5.55  | -8.80  | 3.63 | -5.69  | -7.95 | 3.71 | 0.14  | -0.84 | -0.08 |
| 18637 | -19.97 | -11.21 | 4.25 | -19.75 | -9.80 | 4.61 | -0.21 | -1.40 | -0.36 |
| 18638 | -23.61 | -10.50 | 3.63 | -22.68 | -9.04 | 4.36 | -0.93 | -1.46 | -0.73 |
| 18639 | -10.28 | -10.38 | 2.11 | -10.12 | -9.19 | 2.40 | -0.16 | -1.19 | -0.29 |
| 18652 | -17.17 | -10.36 | 3.05 | -16.87 | -9.01 | 3.45 | -0.30 | -1.34 | -0.39 |
| 18658 | -17.49 | -9.25  | 2.63 | -17.49 | -8.23 | 2.81 | 0.00  | -1.02 | -0.18 |
| 18659 | -11.53 | -10.09 | 3.48 | -11.73 | -9.10 | 3.56 | 0.20  | -0.99 | -0.08 |

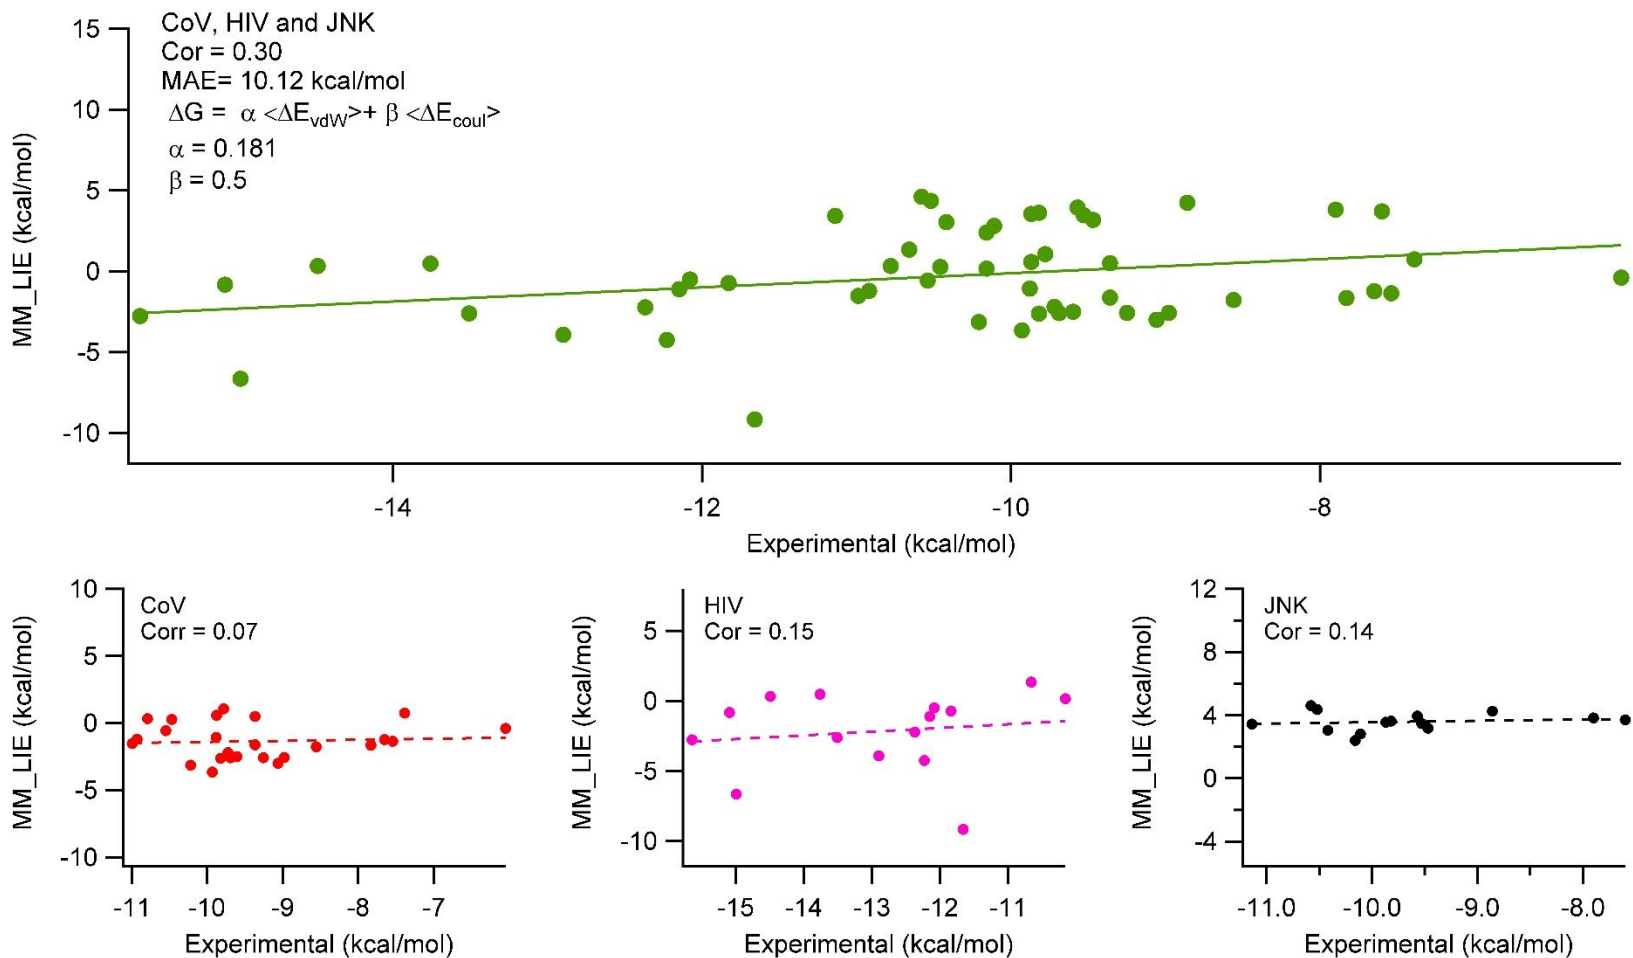

**Figure S3:** The LIE calculated by MM electrostatic and van der Waals interactions using equation (3). The preassigned parameters available in Gromacs software were used. The bottom plots show the correlation in each individual protein family.

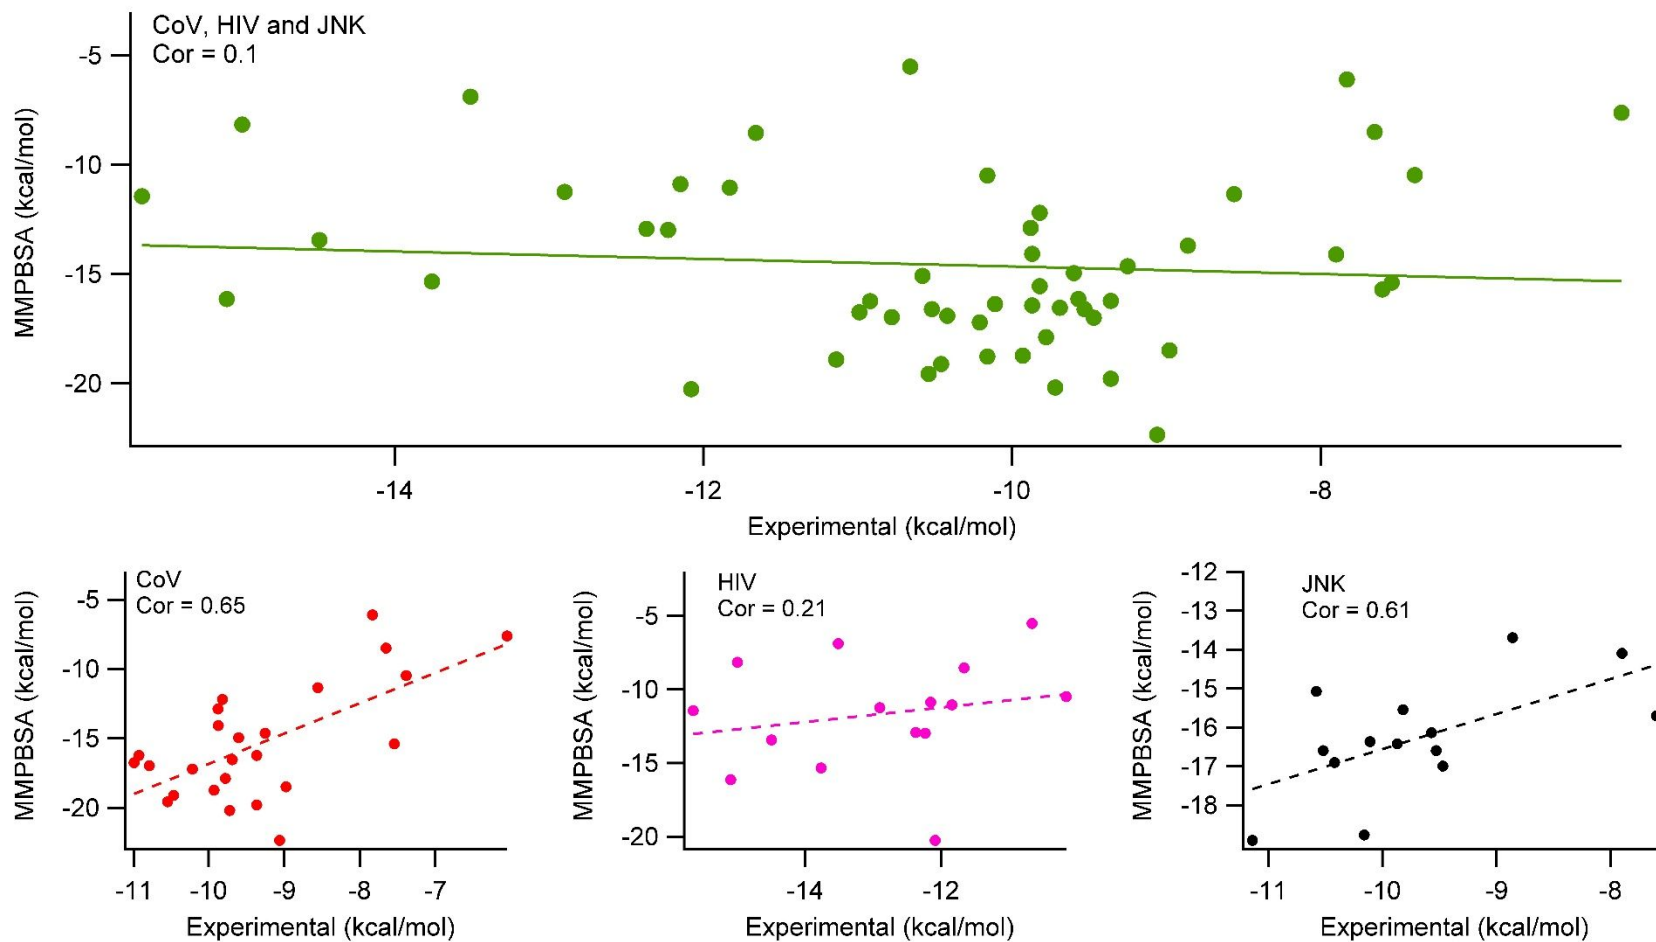

**Figure S4:** MMPBSA results show low correlation due to failure to predict BFEs in HIV-1 protease. The bottom plots show the correlation in each individual protein family.

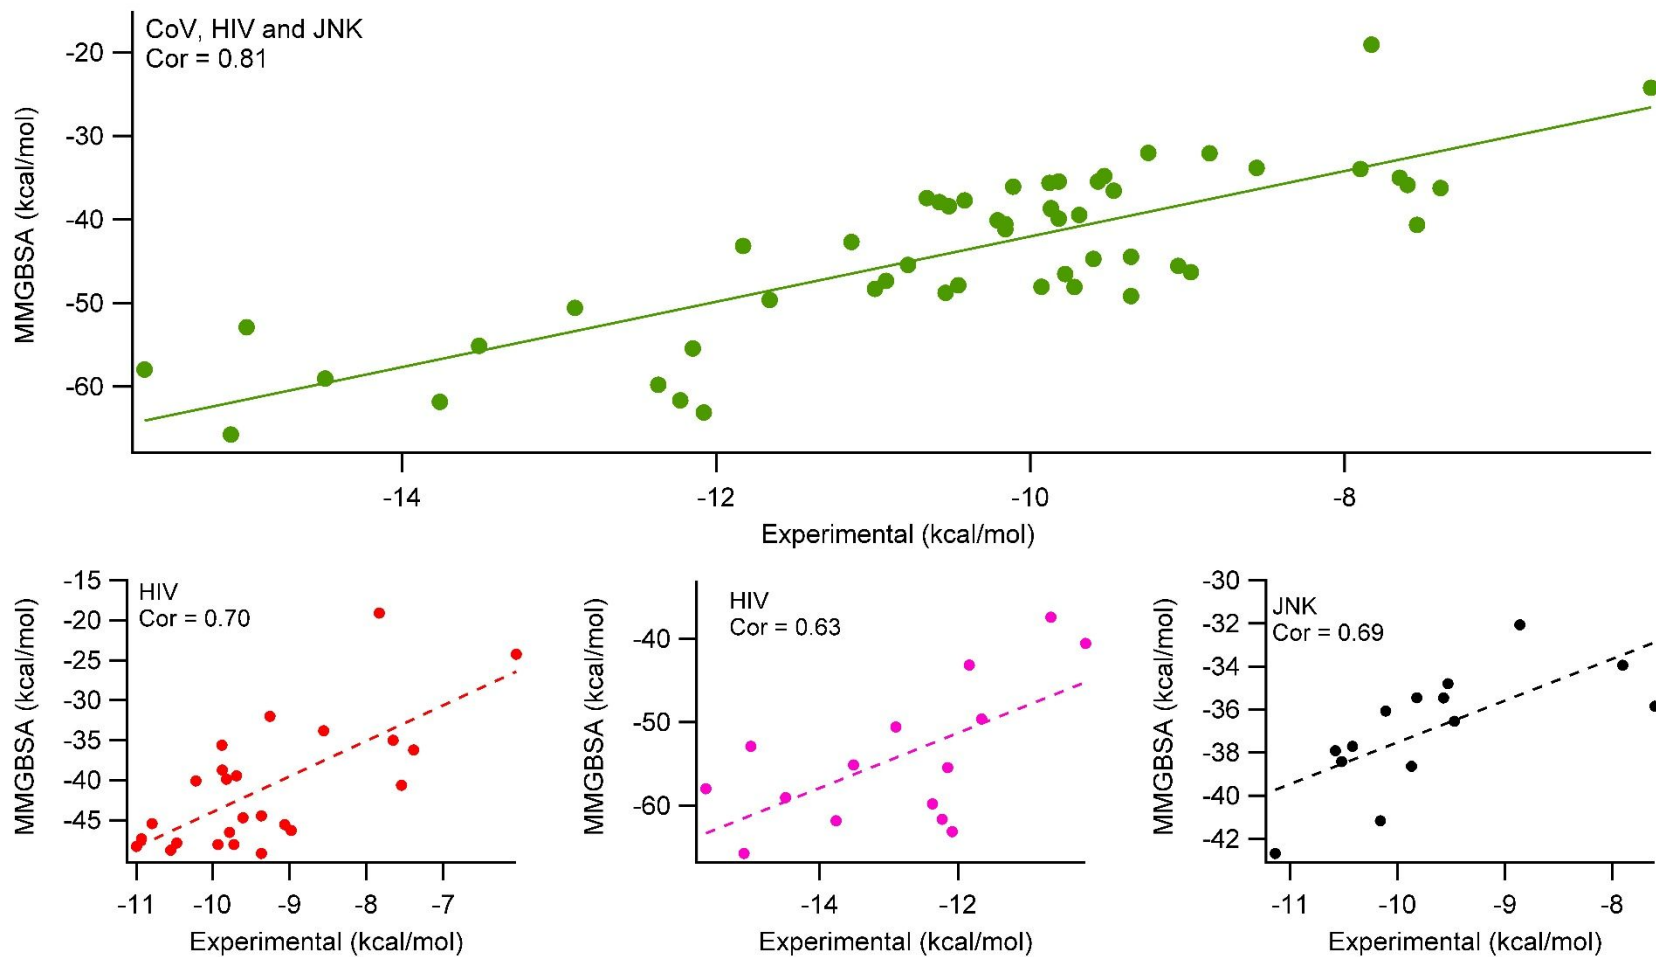

**Figure S5:** MMGBSA results showing higher correlation than LIE, but still lower than ANI\_LIE. The bottom plots show the correlation in each individual protein family.



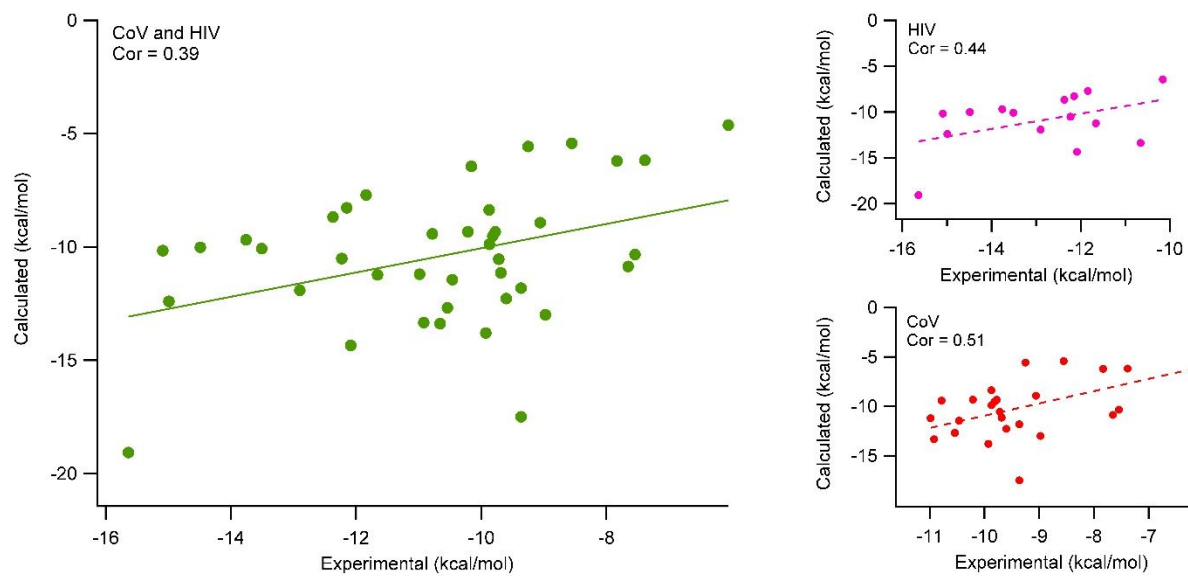

**Figure S6:** BAR results for CoV and HIV compared with experimental results when they are treated together or individually.

Table S2 Coefficient values derived from equations 4-7

| Equation number                                                                                                                                                                                                       | Method    | $\alpha$       | $\beta$       | $\gamma$ (kcal/mol) |
|-----------------------------------------------------------------------------------------------------------------------------------------------------------------------------------------------------------------------|-----------|----------------|---------------|---------------------|
| 4                                                                                                                                                                                                                     | ANI LIE   | 0              | 0.106± 0.016  | -4.987 ± 0.881      |
| 5                                                                                                                                                                                                                     | ANID3 LIE | -0.025±0.028   | 0.124 ± 0.021 | -5.569 ± 0.782      |
| 6                                                                                                                                                                                                                     | ANI LIE   | 0              | 0.127±0.011   | -5.111±0.480        |
| 7                                                                                                                                                                                                                     | ANID3 LIE | -0.035 ± 0.029 | 0.149 ± 0.021 | -5.987 ± 0.806      |
| 7 (RS)                                                                                                                                                                                                                | ANID3 LIE | -0.035±0.008   | 0.148±0.008   | -5.978±0.230        |
| $\alpha$ : van der Waals terms (LJ or D3); $\beta$ :electrostatic term (ele or ANI); $\gamma$ : intercept<br>RS: Random sampling as validation (90% training bootstrapped by 100 different selections) and test (10%) |           |                |               |                     |
